# Supplementary material for: BRCA1 and Breast Cancer: Molecular Mechanisms and Therapeutic Strategies
Source: Front Cell Dev Biol. 2022 Mar 1;10:813457. doi: 10.3389/fcell.2022.813457 (PMC8921524; doi:10.3389/fcell.2022.813457)
Supplement: Supplementary file 1 [file DataSheet1.xlsx]

## Sheet: Sheet1
Clinical_significance_citations_ENIGMA	Clinical_Significance_ClinVar	Individuals_LOVD	Patient_nationality_BIC	Allele_frequency_genome_GnomADv3	Gene_Symbol	HGVS_cDNA	BIC_Nomenclature	Protein_Change
PMID:22505045	Pathogenic	1	-	-	BRCA1	NM_007294.3:c.5331_5332+1delinsCAACAT	5450del3insCAACAT	?
PMID:23451180	Pathogenic	3	-	-	BRCA1	NM_007294.3:c.441+2T>G	IVS7+2T>G	?
PMID:31131967	Likely_pathogenic,Pathogenic	5	-,Swiss	-	BRCA1	NM_007294.3:c.4676-1G>A	IVS15-1 G>A,IVS15-1G>A	?
PMID:31131967	Likely_pathogenic,Pathogenic	1	-	-	BRCA1	NM_007294.3:c.4675+3A>T	IVS15+3A>T	?
PMID:23451180	Pathogenic	3	-	-	BRCA1	NM_007294.3:c.5278-2del	IVS20-2delA	?
PMID:31131967	Likely_pathogenic,Pathogenic	-	-	-	BRCA1	NM_007294.3:c.5277+1_5277+6del	IVS20+1del6	?
PMID:31131967	Likely_pathogenic,Pathogenic	1	-	-	BRCA1	NM_007294.3:c.4484+1del	IVS14+1del	?
PMID:31131967	Pathogenic	5	-	-	BRCA1	NM_007294.3:c.4484G>C	4603G>C	R1495T
PMID:31131967	Pathogenic	3	-	-	BRCA1	NM_007294.3:c.4357+1G>T	IVS13+1G>T	?
PMID:21990134	Pathogenic	4	-	-	BRCA1	NM_007294.3:c.4097-1G>A	IVS11-1G>A	?
PMID:31131967	Pathogenic	5	-	6.758e-06	BRCA1	NM_007294.3:c.4097-2A>G	IVS11-2A>G	?
PMID:23451180	Pathogenic,pathogenic	11	-,Italian	-	BRCA1	NM_007294.3:c.547+2T>A	IVS8+2T>A	?
PMID:31131967	Pathogenic,Uncertain_significance	-	-	-	BRCA1	NM_007294.3:c.5516T>C	5635T>C	L1839S
PMID:21990134	Likely_pathogenic,Pathogenic,Uncertain_significance	6	-	-	BRCA1	NM_007294.3:c.5513T>A	5632T>A	V1838E
PMID:31131967	Likely_pathogenic,Pathogenic,Uncertain_significance	30	-,German,Italian,Not Specified	-	BRCA1	NM_007294.3:c.5509T>C	W1837R	W1837R
PMID:31131967	Pathogenic	5	-	-	BRCA1	NM_007294.3:c.5468-1G>A	IVS23-1G>A	?
PMID:21990134	Pathogenic	15	-	-	BRCA1	NM_007294.3:c.5363G>T	5482G>T	G1788V
PMID:15290653,PMID:28781887	Pathogenic	-	-	-	BRCA1	NM_007294.3:c.5359_5363delinsAGTGA	-	C1787_G1788delinsSD
PMID:23451180	Pathogenic	18	-	-	BRCA1	NM_007294.3:c.5332+1G>A	IVS21+1G>A	?
PMID:21990134	Pathogenic,Uncertain_significance	48	-,African American,Latin American/Caribbean	6.762e-06	BRCA1	NM_007294.3:c.5324T>G	5443T>G	M1775R
PMID:21990134	Likely_pathogenic,Pathogenic	8	-	-	BRCA1	NM_007294.3:c.5324T>A	5443T>A	M1775K
PMID:30105462	Likely_pathogenic,Pathogenic	58	-	-	BRCA1	NM_007294.3:c.5309G>T	-	G1770V
PMID:21990134	Likely_pathogenic,Pathogenic,Uncertain_significance	20	-,Not Specified,Western Europe	-	BRCA1	NM_007294.3:c.5297T>G	5416T>G	I1766S
PMID:21990134	Likely_pathogenic,Pathogenic,Uncertain_significance	13	-,Western Europe	-	BRCA1	NM_007294.3:c.5291T>C	5410T>C	L1764P
PMID:21990134	Pathogenic	230	-,Canadian,Dutch,Dutch?,Spanish,Venezuelan	-	BRCA1	NM_007294.3:c.5277+1G>A	IVS19+1 G>A,IVS20+1G>A	?
PMID:21990134	Likely_pathogenic,Pathogenic,Uncertain_significance	68	-,Greek,Western Europe	-	BRCA1	NM_007294.3:c.5212G>A	5331G>A	G1738R
PMID:21990134	Likely_pathogenic,Pathogenic,Uncertain_significance	6	-,Western Europe	-	BRCA1	NM_007294.3:c.5194-12G>A	IVS19-12G>A	?
PMID:21990134	Likely_pathogenic,Pathogenic	9	-,Not Specified,Spanish,Sweden	-	BRCA1	NM_007294.3:c.5153-1G>C	IVS18-1G>C	?
PMID:31131967	Pathogenic	13	-,Dutch,Spanish,Western Europe	-	BRCA1	NM_007294.3:c.5153-1G>A	IVS18-1G>A	?
PMID:21990134	Pathogenic	8	-	-	BRCA1	NM_007294.3:c.5152+1G>T	IVS18+1G>T	?
PMID:31131967	Likely_pathogenic,Pathogenic,Uncertain_significance	6	-,Spanish	-	BRCA1	NM_007294.3:c.5144G>A	S1715N	S1715N
PMID:21990134	Pathogenic,Uncertain_significance	11	Denmark	-	BRCA1	NM_007294.3:c.5143A>C	5262A>C	S1715R
PMID:21990134	Pathogenic	99	-,Italian,Latin American/Caribbean,Near East/Mid East,Not Specified,Spanish,Sweden,Western Europe	-	BRCA1	NM_007294.3:c.5123C>A	5242C>A	A1708E
PMID:21990134	Likely_pathogenic,Pathogenic,Uncertain_significance	16	-,Spanish	6.762e-06	BRCA1	NM_007294.3:c.5117G>A	5236G>A	G1706E
PMID:28490613,PMID:18036263,PMID:23867111,PMID:30257991,PMID:30765603,PMID:11157798,PMID:22889855,PMID:30962250	Likely_pathogenic,Pathogenic,Uncertain_significance	78	-,Not Specified	1.353e-05	BRCA1	NM_007294.3:c.5096G>A	R1699Q	R1699Q
PMID:21990134	Pathogenic	75	-,German,Not Specified,Sweden	-	BRCA1	NM_007294.3:c.5095C>T	5214C>T	R1699W
PMID:31131967	Likely_pathogenic,Pathogenic,Uncertain_significance	13	Danish,Denmark	-	BRCA1	NM_007294.3:c.5089T>C	C1697R	C1697R
PMID:31131967	Likely_pathogenic,Pathogenic	7	-	-	BRCA1	NM_007294.3:c.5074+2T>C	IVS17+2T>C	?
PMID:31131967	Likely_pathogenic,Pathogenic	7	-,Western European	-	BRCA1	NM_007294.3:c.5074+1G>T	IVS17+1G>T	?
PMID:21990134	Pathogenic	11	-	-	BRCA1	NM_007294.3:c.5074+1G>A	IVS17+1G>A	?
PMID:31131967	Likely_pathogenic,Pathogenic	10	-	-	BRCA1	NM_007294.3:c.5074G>C	D1692H	D1692H
PMID:31131967	Pathogenic,Uncertain_significance	10	-,Italian	6.761e-06	BRCA1	NM_007294.3:c.5062_5064del	V1688del	V1688del
PMID:20513136	Pathogenic,Uncertain_significance	12	-	-	BRCA1	NM_007294.3:c.5054C>T	5173C>T	T1685I
PMID:21990134	Pathogenic,Uncertain_significance	9	-	-	BRCA1	NM_007294.3:c.5053A>G	5172A>G	T1685A
PMID:23451180	Likely_pathogenic,Pathogenic	6	-	-	BRCA1	NM_007294.3:c.4987-1G>A	IVS16-1G>A	?
PMID:31131967	Pathogenic	8	-	-	BRCA1	NM_007294.3:c.4987-2A>G	IVS16-2A>G	?
PMID:31131967	Likely_pathogenic,Pathogenic,not_provided	10	-	-	BRCA1	NM_007294.3:c.4986+6T>G	IVS16+6T>G	?
PMID:21990134	Likely_pathogenic,Pathogenic	15	-,Czech	-	BRCA1	NM_007294.3:c.4675+1G>A	IVS15+1G>A	?
PMID:31131967	Likely_pathogenic,Pathogenic	11	-	6.763e-06	BRCA1	NM_007294.3:c.4675G>A	E1559K	E1559K
PMID:31131967	Pathogenic	1	-	-	BRCA1	NM_007294.3:c.4485-1G>T	IVS14-1G>T	?
PMID:21769658	Pathogenic	13	-,African American	1.352e-05	BRCA1	NM_007294.3:c.4357+1G>A	IVS13+1G>A	?
PMID:31131967	Pathogenic	4	German	-	BRCA1	NM_007294.3:c.4185+2_4185+22delinsA	IVS12+2del21insA	?
PMID:31131967	Pathogenic	9	-,Czech	-	BRCA1	NM_007294.3:c.4185G>A	4304G>A	Q1395=
PMID:31131967	Likely_pathogenic,Pathogenic	8	-,Western Europe	-	BRCA1	NM_007294.3:c.547+1G>T	IVS8+1G>T	?
PMID:21990134	Pathogenic	3	-	-	BRCA1	NM_007294.3:c.302-1G>C	IVS6-1G>C	?
PMID:31131967	Pathogenic	9	-,Western Europe	6.767e-06	BRCA1	NM_007294.3:c.302-2del	IVS6-2delA	?
PMID:31131967	Pathogenic	9	-,Western Europe	6.767e-06	BRCA1	NM_007294.3:c.302-2del	IVS6-2delA	?
PMID:31131967	Pathogenic	35	-,Dutch,German,Malaysian,Not Specified,Russian/German/Italian,Western Europe,Western/Central/Eastern Europe	-	BRCA1	NM_007294.3:c.213-12A>G	IVS5-12 A>G,IVS5-12A>G	?
PMID:21990134	Likely_pathogenic,Pathogenic,Uncertain_significance,not_provided	103	-,Belgian,Belgian?,French?,German	6.758e-06	BRCA1	NM_007294.3:c.212+3A>G	IVS5+3A>G	?
PMID:31131967	Pathogenic	17	-,China,German	-	BRCA1	NM_007294.3:c.212+1G>T	IVS5+1G>T	?
PMID:31131967	Pathogenic	14	-,Austrian,Spanish	-	BRCA1	NM_007294.3:c.212+1G>A	IVS5+1G>A,IVS5+1G>Adel22,U14680.1:n.331+1G>A,del22	?
PMID:31131967	Pathogenic	47	-,Latin American/Caribbean,Not Specified,Spanish	-	BRCA1	NM_007294.3:c.211A>G	R71G	R71G
PMID:31131967	Pathogenic	29	-,Not Specified,US	-	BRCA1	NM_007294.3:c.191G>A	C64Y	C64Y
PMID:21990134	Pathogenic,not_provided	130	-,American,Austria,Austrian,Canadian,Central/Eastern Europe,Czech,Danish,French,French?,German,Italian,Latvian,Native American,Near East/Mid East,Not Specified,Swedish,U.S.A.,Western Europe	2.703e-05	BRCA1	NM_007294.3:c.181T>G	300T>G	C61G
PMID:31131967	Likely_pathogenic,Pathogenic	4	-	-	BRCA1	NM_007294.3:c.140G>A	259G>A	C47Y
PMID:31131967	Pathogenic,not_provided	9	-,Western Europe,Western European	6.767e-06	BRCA1	NM_007294.3:c.135-1G>T	IVS3-1G>T,IVS4-1G>T	?
PMID:31131967	Likely_pathogenic,Pathogenic,Uncertain_significance	20	-,American	-	BRCA1	NM_007294.3:c.131G>T	C44F	C44F
PMID:21990134	Pathogenic,Uncertain_significance	8	-	-	BRCA1	NM_007294.3:c.131G>A	250G>A	C44Y
PMID:21990134	Pathogenic,Uncertain_significance	10	-	-	BRCA1	NM_007294.3:c.130T>A	249T>A	C44S
PMID:24212087	Likely_pathogenic,Pathogenic,Uncertain_significance	7	-	-	BRCA1	NM_007294.3:c.122A>G	241A>G	H41R
PMID:21990134	Pathogenic,Uncertain_significance	13	-,Czech	-	BRCA1	NM_007294.3:c.115T>C	234T>C	C39R
PMID:21990134	Likely_pathogenic,Pathogenic,Uncertain_significance	2	American	-	BRCA1	NM_007294.3:c.110C>A	229C>A	T37K
PMID:31131967	Likely_pathogenic,Pathogenic,Uncertain_significance	3	-	-	BRCA1	NM_007294.3:c.81-9C>G	IVS2-9C>G	?
PMID:21990134	Likely_pathogenic,Pathogenic,Uncertain_significance	6	-	-	BRCA1	NM_007294.3:c.65T>C	184T>C	L22S
PMID:31131967	Likely_pathogenic,Pathogenic,Uncertain_significance	25	-	-	BRCA1	NM_007294.3:c.53T>C	M18T	M18T
PMID:31131967	Pathogenic	5	-,English	-	BRCA1	NM_007294.3:c.3G>T	M1I	Met1?
PMID:30968603	Likely_pathogenic	1	-,Chinese	-	BRCA1	NM_007294.3:c.123_124delCAinsAT	?	?
PMID:30968603	Pathogenic	1	-,Chinese	-	BRCA1	NM_007294.3:c.1934delC	?	?
PMID:30968603	Pathogenic	1	-,Chinese	-	BRCA1	NM_007294.3:c.2054delinsGAAGAGTAACAAG TAAGAAGAGTAACAAGAAG	?	?
PMID:30968603	Pathogenic	1	-,Chinese	-	BRCA1	NM_007294.3:c.5093_5096delCTAA	?	?
PMID:30968603	Likely_pathogenic	1	-,Chinese	-	BRCA1	NM_007294.3:c.5396−2A>G	?	?
PMID:33461583	Pathogenic	14	-,Chinese	0.000659879	BRCA1	NM_007294.3:c.981_982delAT	1100 1101delAT, 1100delAT	C328*
PMID:33461583	Pathogenic	13	-,Chinese	0.000565611	BRCA1	NM_007294.3:c.2110_2111delAA	2229delAA	N704C
PMID:33461583	Pathogenic	19	-,Chinese	0.000754148	BRCA1	NM_007294.3:c.5584delA	?	?
PMID:33461583	Pathogenic	91	-,Chinese	0.00377074	BRCA1	NM_007294.3:c.5533_5540delATTGGGCA	?	?
PMID:32467295	Pathogenic	2	-,Chinese	-	BRCA1	NM_007294.3:c.961_962insAGAT	?	?
PMID:32467295	Pathogenic	1	-,Chinese	-	BRCA1	NM_007294.3:c.962G>A	W321X	W321*
PMID:32467295	Pathogenic	1	-,Chinese	-	BRCA1	NM_007294.3:c.1016delA	1129delA, 1135delA	K339R
PMID:32467295	Pathogenic	1	-,Chinese	-	BRCA1	NM_007294.3:c.1504_1508delTTAAA	1623 1627delTTAAA, 1623del5	L502A
PMID:32467295	Pathogenic	1	-,Chinese	-	BRCA1	NM_007294.3:c.2293G>T	E765X	E765*
PMID:32467295	Pathogenic	1	-,Chinese	-	BRCA1	NM_007294.3:c.2302delA	?	S768V
PMID:32467295	Pathogenic	1	-,Chinese	-	BRCA1	NM_007294.3:c.2572C>T	2691C>T-Gln858ter, p.Gln858X	Q858*
PMID:32467295	Pathogenic	1	-,Chinese	-	BRCA1	NM_007294.3:c.3294delT	?	P1099L
PMID:32467295	Pathogenic	1	-,Chinese	-	BRCA1	NM_007294.3:c.4327C>T	446C>T	?
PMID:32467295	Pathogenic	1	-,Chinese	-	BRCA1	NM_007294.3:c.5406+1G>A	?	?
PMID:32467295	Pathogenic	2	-,Chinese	-	BRCA1	NM_007294.3:c.5521delA	5640delA	S1841V
DOI: 10.1200/JCO.2020.38.15_suppl.e13684	Pathogenic	-	-,Chinese	-	BRCA1	NM_007294.3:c.5470_5477delATTGGGCA	5589del8	I1824D
PMID:32211327	Pathogenic	1	-,Chinese	-	BRCA1	NM_007294.3:c.981_982delAT	1100 1101delAT, 1100delAT	C328*
PMID:32211327	Likely pathogenic	1	-,Chinese	-	BRCA1	NM_007294.3:c.80+5G>A	?	?
PMID:32211327	Pathogenic	1	-,Chinese	-	BRCA1	NM_007294.3:c.686_687delCT	?	?
PMID:32211327	VUS	1	-,Chinese	-	BRCA1	NM_007294.3:c.671-6T>G	?	?
PMID:32211327	Pathogenic	2	-,Chinese	-	BRCA1	NM_007294.3:c.66dupA	185 186insA, 185insA	E23R
PMID:32211327	Pathogenic	1	-,Chinese	-	BRCA1	NM_007294.3:c.5521delA	5640delA	S1841V
PMID:32211327	Pathogenic	2	-,Chinese	-	BRCA1	NM_007294.3:c.5470_5477delATTGGGCA	5589del8	I1824D
PMID:32211327	Pathogenic	1	-,Chinese	-	BRCA1	NM_007294.3:c.5333-1G>A	?	?
PMID:32211327	VUS	1	-,Chinese	-	BRCA1	NM_007294.3:c.5330C>T	?	?
PMID:32211327	Pathogenic	1	-,Chinese	-	BRCA1	NM_007294.3:c.5257A>T	?	?
PMID:32211327	Pathogenic	1	-,Chinese	-	BRCA1	NM_007294.3:c.5251C>T	5370C>T	R1751*
PMID:32211327	Pathogenic	1	-,Chinese	-	BRCA1	NM_007294.3:c.514C>T	Q172X	Q172*
PMID:32211327	VUS	1	-,Chinese	-	BRCA1	NM_007294.3:c.5108A>G	?	?
PMID:32211327	Likely pathogenic	1	-,Chinese	-	BRCA1	NM_007294.3:c.5096G>A	R1699Q	R1699Q
PMID:32211327	Pathogenic	1	-,Chinese	-	BRCA1	NM_007294.3:c.5074G>A	?	?
PMID:32211327	Pathogenic	1	-,Chinese	-	BRCA1	NM_007294.3:c.4963delT	?	?
PMID:32211327	Pathogenic	1	-,Chinese	-	BRCA1	NM_007294.3:c.4675+1G>A	IVS15+1G>A	?
PMID:32211327	VUS	1	-,Chinese	-	BRCA1	NM_007294.3:c.441+9A>G	?	?
PMID:32211327	Pathogenic	1	-,Chinese	-	BRCA1	NM_007294.3:c.4327C>T	4446C>T	R1443*	R1443*
PMID:32211327	Pathogenic	1	-,Chinese	-	BRCA1	NM_007294.3:c.4066_4069del	4185del4, p.Gln1356fs	Q1356K
PMID:32211327	Pathogenic	1	-,Chinese	-	BRCA1	NM_007294.3:c.3877delG	?	?
PMID:32211327	Pathogenic	1	-,Chinese	-	BRCA1	NM_007294.3:c.3841C>T	p.Gln1281*	Q1281*
PMID:32211327	Pathogenic	1	-,Chinese	-	BRCA1	NM_007294.3:c.375_376insT	494insT, p.Gln126fs	Q126Sf
PMID:32211327	Pathogenic	1	-,Chinese	-	BRCA1	NM_007294.3:c.3598C>T	3717C>T	Q1200*
PMID:32211327	VUS	1	-,Chinese	-	BRCA1	NM_007294.3:c.3448C>T	?	?
PMID:32211327	Pathogenic	1	-,Chinese	-	BRCA1	NM_007294.3:c.3288_3289delAA	3407delAA	L1098S
PMID:32211327	Pathogenic	1	-,Chinese	-	BRCA1	NM_007294.3:c.3257T>G	L1086X	L1086*
PMID:32211327	Pathogenic	1	-,Chinese	-	BRCA1	NM_007294.3:c.284_288del	?	?
PMID:32211327	VUS	1	-,Chinese	-	BRCA1	NM_007294.3:c.2286A>T	?	?
PMID:32211327	Pathogenic	1	-,Chinese	-	BRCA1	NM_007294.3:c.2138C>G	S713X	S713*
PMID:32211327	VUS	1	-,Chinese	-	BRCA1	NM_007294.3:c.1966A>T	?	?
PMID:32211327	VUS	1	-,Chinese	-	BRCA1	NM_007294.3:c.1937G>T	?	?
PMID:32211327	Pathogenic	1	-,Chinese	-	BRCA1	NM_007294.3:c.1465G>T	1584G>T, p.Glu489X	E489*
PMID:32211327	Pathogenic	1	-,Chinese	-	BRCA1	NM_007294.3:c.1356_1357insAG	?	?
